# Supplementary material
Source: publisher figshare collection journal article supplement (https://geolsoc.figshare.com/ndownloader/files/14400890)
Supplement: Supplementary file 1 [file 14400890]

## Sheet: Point count data
Sample	UP13/5211	NW14/144	N14/112	N14/115	NZ14/66	NZ13.251	N13/293	NZ13/295	NZ13/301	N13/61	NZ13.256	N14/104	N13/260	NZ13.297	NZ13.299	NZ13.275	N13/67	N14/98	NZ13.103	N14-190	NZ13.403	NZ13.405	N14.168	NZ13.68	NZ13.75
Rock type
Formation	Upukerora Formation	Upukerora Formation	Upukerora Formation	Upukerora Formation	Upukerora Formation	Wooded Peak Formation	Wooded Peak Formation	Wooded Peak Fm.	Wooded Peak Fm.	Wooded Peak Fm.	Wooded Peak Fm.	Wooded Peak Fm.	Tramway Fm.	Tramway Fm.	Tramway Fm.	Tramway Fm.	Tramway Fm.	Tramway Fm.	Tramway Fm.	Tramway Fm.	Little Ben Fm.	Little Ben Fm.	Little Ben Fm.	Little Ben Fm.	Little Ben Fm.
Region	E Eglington	Bald Hill	West Dome	West Dome	Gyzeh	Maitai River	Roding River	Roding River	West Dome	West Dome	Maitai River	West Dome	Maitai River	Roding River	Roding River	Roding River	West Dome	West Dome	North Lintley Hills	Roding River	Wairoa River	Wairoa River	Mount Mistake	West Dome	West Dome
GPS
Quartz	20.2749	3.09278	0.362319	6.2963	7.01754	5.38721	28.2313	24.8299	10.4377	1.56863	11.2319	4.7619	25	29.3333	29.3333	30	35	29.3333	31.3333	4.66667	0	1.75439	4.51389	3.0303	12.1864
Feldspar	27.8351	29.2096	25.7246	28.8889	39.6491	58.2492	47.619	32.3129	62.2896	21.1765	5.43478	25.7937	28.6667	28.3333	29.6667	42.3333	41	28.3333	36.3333	67.3333	39.2982	44.2105	11.8056	36.7003	8.24373
Lithic fragments	51.89	67.6976	73.913	64.8148	53.3333	36.3636	24.1497	42.8571	27.2727	77.2549	83.3333	69.4444	46.3333	42.3333	41	27.6667	24	42.3333	32.3333	28	60.7018	54.0351	83.6806	60.2694	79.5699
Sample	NZ13.308	NZ13.312	NZ13.313	NZ14.110	NZ14.111	NZ13.311	NZ13.284	NZ13.316	NZ13.310	NZ14.201	NZ13.400	NZ13.217	NZ13.200	NZ13.208	NZ14.208	Nz17.184	Nz17.186	Nz17.187	N17-9	Nz17-14	nz17-183	nz17-189	nz17-205	n17-214	n17-188	Nz17-209
Rock type
Formation	Greville Formation	Greville Formation	Greville Formation	Greville Formation	Greville Formation	Wiaua formation	Wiaua formation	Wiaua Fm.	Wiaua Fm.	Stephens Subgp.	Stephens Subgp.	Stephens Subgp.	Stephens Subg.	Stephens Subgp.	Stephens Subgp.	Stephens Subgp.	Stephens Subgp.	Stephens Subgp.	Stephens Subgp.	Stephens Subgp.	Stephens Subgp.	Stephens Subgp.	Stephens Subgp.	Stephens Subgp.	Stephens Subgp.	Stephens Subgp.
Region	Roding River	Roding River	Roding River	West Dome	West Dome	Roding River	Maitai River	Roding River	Roding River	Bare Peak	Neds Creek	Bare Peak	Bare Peak	Bare Peak	Pig Valley quarry	Pig Valley quarry	Pig Valley quarry	Wairoa River	Willsher Gp.	Willsher Group	Pig Valley	Pig Valley	Lee Valley	Wairoa river	Wairoa river	East of Stoke
GPS
Quartz	3.0303	1.3468	2.0202	0.673401	0.673401	14.1414	20.8754	15.0877	15.1515	2.0202	1.38889	7.07071	3.06122	4.7138	0.687285	13.9535	16.6667	12.6667	13.6	9.66667	17	1.33333	33	1.97628	25.3333	8
Feldspar	46.1279	26.5993	22.8956	24.5791	27.2727	10.7744	11.1111	7.36842	8.41751	46.4646	74.3056	28.6195	22.1088	29.2929	41.2371	51.1628	56.6667	32.6667	16	30.3333	38.6667	34.6667	14.5	46.6403	18.3333	13.6667
Lithic fragments	50.8418	72.0539	75.0842	74.7475	72.0539	75.0842	68.0135	77.5439	76.431	51.5152	24.3056	64.3098	74.8299	65.9933	58.0756	17.2757	15	22.3333	25.6	21	27.3333	46.3333	31	25.6917	30	41
